1 **A rapid CRISPR competitive assay for *in vitro* and *in vivo* discovery**  
2 **of potential drug targets affecting the hematopoietic system**

3  
4 Yunbing Shen<sup>a</sup>, Long Jiang<sup>a</sup>, Vaishnavi Srinivasan Iyer<sup>a,b</sup>, Bruno Raposo<sup>a</sup>, Sanjay V. Boddul<sup>a</sup>,  
5 Zsolt Kasza<sup>a</sup>, Fredrik Wermeling<sup>a,\*</sup>

6  
7 <sup>a</sup>Department of Medicine Solna, Center for Molecular Medicine, Karolinska University  
8 Hospital and Karolinska Institutet, Stockholm, Sweden.

9 <sup>b</sup>School of Physical and Mathematical Sciences, Nanyang Technological University,  
10 Singapore.

11  
12 \* Corresponding author. Center for Molecular Medicine, L8:03, Karolinska University  
13 Hospital, 171 76 Stockholm, Sweden. Email: fredrik.wermeling@ki.se.

14  
15  
16 CRISPR/Cas9 can be used as an experimental tool to inactivate genes in cells. However, a  
17 CRISPR-targeted cell population will not show a uniform genotype of the targeted gene.  
18 Instead, a mix of genotypes is generated - from wild type to different forms of insertions and  
19 deletions. Such mixed genotypes complicate analyzing the role of the targeted gene in the  
20 studied cell population. Here, we present a rapid experimental approach to functionally analyze  
21 a CRISPR-targeted cell population that does not involve generating clonal cell lines. As a  
22 simple readout, we leverage the CRISPR-induced genetic heterogeneity and use sequencing to  
23 identify how different genotypes are enriched or depleted related to the studied cellular behavior  
24 or phenotype. The approach uses standard PCR, Sanger sequencing, and a simple sequence  
25 deconvoluting software, enabling laboratories without specific in-depth knowledge to also  
26 perform these experiments. As proof of principle, we present examples studying the role of  
27 different genes for various aspects related to hematopoietic cells (T cell development *in vivo*  
28 and activation *in vitro*, macrophage phagocytosis, and a leukemia-like phenotype induced by  
29 overexpressing a proto-oncogene). In conclusion, we present a rapid experimental approach to  
30 identify potential drug targets related to mature immune cells, as well as normal and malignant  
31 hematopoiesis.

32  
33

34 **Highlights:**

- 35 - CRISPR generates genetic heterogeneity at the targeted site.
- 36 - Genetic heterogeneity complicates identifying the role of a targeted gene.
- 37 - Heterogeneity can be quantified by Sanger sequencing with sufficient sensitivity.
- 38 - Enrichment of specific genotypes can be used to identify roles for targeted genes.
- 39 - Competitive experiments show the potential of genotype enrichment as a discovery tool.

41 **Graphical representation:**

42

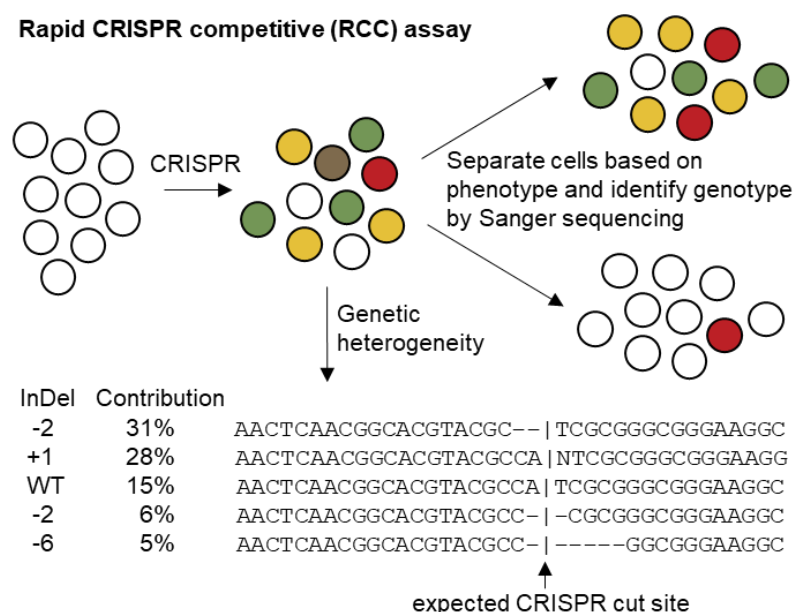

43 **Keywords:**

44 CRISPR, sequence analysis, drug target discovery, cell assay, *in vivo* model, hematopoiesis,  
45 immune cells, leukemia.

46

47 **Abbreviations:**

48 Amino acid (AA); bone marrow (BM); Clustered Regularly Interspaced Short Palindromic  
49 Repeats (CRISPR); control (ctrl); fragment length analysis (FLA); granulocyte-macrophage  
50 precursor (GMP); hematopoietic stem cell (HSC); immuno-CRISPR (iCR); Indel Detection by  
51 Amplicon Analysis (IDAA); Inference of CRISPR Edits (ICE); insertion or deletion (InDel);  
52 knockout (KO); lineage (Lin); next-generation sequencing (NGS); peripheral blood  
53 mononuclear cells (PBMC), rapid CRISPR competitive assay (RCC assay); single guide RNA  
54 (sgRNA); short hairpin RNA (shRNA); small interfering RNA (siRNA); Tracking of Indels by  
55 Decomposition (TIDE); T cell receptor alpha chain constant (TRAC); wild type (WT).

56

## 57 **1. Introduction**

58

### 59 1.1 Clustered Regularly Interspaced Short Palindromic Repeats (CRISPR)

60 CRISPR has been developed from its natural prokaryotic origins into a set of molecular biology  
61 tools that can be used to modify genes in eukaryotic cells [1-4]. In its most simple form, a  
62 CRISPR experiment involves delivering a single guide RNA (sgRNA), with specificity for the  
63 gene of interest, and the endonuclease Cas9 into the nucleus of the studied cell [5]. Due to its  
64 simplicity, CRISPR is playing an increasingly important role in generating cell lines and animal  
65 models with specific genetic modifications. Experiments comparing pairs of cell lines or  
66 animals that differ at one specific genetic region, for example being wild type (WT) and  
67 knockout (KO) for a gene of interest, is a powerful approach extensively used to identify the  
68 role of the gene for a studied phenotype. However, the mutation spectrum generated in a  
69 CRISPR-targeted cell population is not uniform. Instead, both unmodified (WT), as well as  
70 insertions and deletions (InDels) of different sizes, are typically generated when the Cas9  
71 induced DNA damage is repaired by the error-prone non-homologous end-joining pathway [6,  
72 7]. The genetic heterogeneity makes it difficult to directly analyze the role of a targeted gene,  
73 and researchers often generate clonal lines with defined mutations from the modified cell  
74 population. It is, however, not feasible to generate extensive clonal lines from many cell types,  
75 including most primary cell populations. Several approaches have been developed to evaluate  
76 the genetic heterogeneity in a CRISPR-targeted cell population. These include next-generation  
77 sequencing (NGS) platforms [8-10], approaches based on fragment length analysis (FLA) of  
78 PCR amplicons, like IDAA (Indel Detection by Amplicon Analysis) [11, 12], as well as analysis  
79 tools like ICE (Inference of CRISPR Edits) [13], and TIDE (Tracking of Indels by  
80 DEcomposition) [14] that deconvolute Sanger sequencing data into the frequency of different  
81 genotypes found in a sample.

82

### 83 1.2 The hematopoietic system

84 Hematopoiesis is the essential process where mature immune cells, platelets, and erythrocytes  
85 are formed from hematopoietic stem cells (HSCs) located in specific adult bone marrow (BM)  
86 niches of higher vertebrates [15-18]. This concept was formally proven in the 1950s by  
87 experiments and clinical treatment showing that the transplantation of BM cells into an  
88 irradiated host results in the formation of mature cells stemming from the donor HSCs [19, 20].  
89 Due to its feasibility, BM transplantations have been extensively used in experimental  
90 immunological research, for example, to compare the response of immune cells with different

91 genotypes *in vivo*. As such, BM cells from mice with different genotypes (for example WT and  
92 KO for a gene of interest) can be combined and transplanted into an irradiated recipient mouse,  
93 generating a “mixed BM chimeric” mouse. By using different congenic markers, like CD45.1  
94 and CD45.2 [21, 22], to track cells from the different BM donors, cells with different genotypes  
95 in the recipient mouse can be separated by flow cytometry and the role of the targeted gene  
96 identified for a studied phenotype.

97 Of additional importance, malignancies at different developmental stages of the  
98 hematopoietic lineage, including leukemia, represent the major cancer types seen in children  
99 and adolescence [23], as well as constituting a significant amount of all cancers observed in  
100 adults [24].

101

## 102 **2. Material and methods**

103

### 104 2.1 Mice

105 8- to 12-week-old, sex- and age-matched mice were used in experiments. All mice were housed  
106 in specific pathogen-free conditions with a 12/12-hour light/dark cycle and fed standard chow  
107 diet ad libitum. All animal experiments were approved by the local ethical committee at  
108 Karolinska Institute, Sweden. The following mouse strains from Jackson Laboratory were used:  
109 C57BL/6 Cas9+ GFP+ (stock no. 026179, CD45.2+), and C57BL/6 CD45.1 (stock no. 002014).  
110 C57BL/6 Cas9+ GFP+ mice and CD45.1 mice were crossed, detecting GFP and CD45.1 by  
111 flow cytometry, to generate homozygous Cas9+ GFP+ CD45.1+ mice (Cas9.1).

112 Bone marrow transplantation was performed by i.v. injection of  $\sim 10^6$  bone marrow cells into  
113 recipient mice irradiated with 900 rad of  $\gamma$ -irradiation 12-24 hours earlier. The bone marrow  
114 cells were typically electroporated with a sgRNA just before being injected into the recipient  
115 mice. To evaluate the mutations of the BM cells, a fraction of the electroporated cells were kept  
116 in culture, to allow for the CRISPR event to occur, and sequenced two days later.

117

### 118 2.2 sgRNA and primer design.

119 The Green Listed software (<http://greenlisted.cmm.ki.se>) [25, 26] utilizing the Brie reference  
120 library, typically selecting the sgRNA with the highest on-target activity [27], or  
121 <https://design.synthego.com/#/> were used to design sgRNAs. sgRNAs with stabilizing 2'-O-  
122 methyl and phosphorothioate linkages were ordered from Sigma-Aldrich or Synthego. The  
123 geneMANIA plugin for Cytoscape [28] was used to identify potential interaction partners of  
124 HOXB8, as discussed in [26]. Primers were designed using Primer-BLAST

125 (<https://www.ncbi.nlm.nih.gov/tools/primer-blast/>), aiming for a 400-800 bp amplicon with the  
126 sgRNA binding site in the middle. The used sgRNA and primer sequences are listed in  
127 Supplementary tables 1 and 2.

128

### 129 2.3 Isolating, CRISPR modifying, and differentiating bone marrow (BM) cells

130 BM cells were collected by flushing femurs and tibias with PBS. Lineage negative cells (Lin-)  
131 were obtained by depleting lineage positive cells (Lin+) from the BM cells using MACS buffer  
132 (Miltenyi Biotec, #130-091-221), Lineage Cell Detection Cocktail-Biotin (Miltenyi Biotec,  
133 #130-092-613, 1:100), Anti-Biotin MicroBeads (Miltenyi Biotec, #130-090-485), and LS  
134 column (Miltenyi Biotec, #130-042-401), according to the protocol suggested by the  
135 manufacturer. Lin- cells were culture in complete RPMI medium (cRPMI) containing 20 ng/ml  
136 of SCF (PeproTech, #250-03), TPO (PeproTech, #315-14), IL-3 (PeproTech, #213-13), and IL-  
137 6 (PeproTech, #216-16) for two days. cRPMI: RPMI-1640 (Sigma-Aldrich #R0883) with 10%  
138 heat-inactivated fetal bovine serum and 1% penicillin-streptomycin-glutamine (100X, Gibco,  
139 #10378016). Cells were cultured at 37 °C in a humidified incubator with 5% CO<sub>2</sub> and handled  
140 in laminar flow hoods using standard sterile techniques.

141 The Neon Transfection System (Invitrogen, #MPK5000) was used for electroporation-based  
142 delivery of CRISPR components, following the manufacturer's instructions initially using the  
143 suggested program testing 24 different conditions. Electroporation condition #5 (Pulse voltage:  
144 1700 V, Pulse width: 20 ms, Pulse number: 1) was used unless otherwise specified. For BM  
145 cells, typically 50-100 pmol sgRNA was delivered into  $2 \times 10^5$  cells per electroporation using  
146 the Neon 10  $\mu$ L Kit (Invitrogen, #MPK1096) or 500-1000 pmol of sgRNA delivered into  $2 \times 10^6$   
147 cells per electroporation using the Neon 100  $\mu$ L Kit (Invitrogen, MPK10096). Electroporated  
148 Lin- cells were kept in culture for two days in cRPMI with cytokines before sequencing to allow  
149 for the CRISPR events to occur. Trp53 siRNA was typically delivered in the same reaction as  
150 the sgRNAs. Trp53 ON-TARGETplus mouse siRNA SMARTPool was ordered from Horizon  
151 Discovery (#L-040642-00-0005). 100 pmol of siRNA was delivered into  $2 \times 10^5$  Lin- cells per  
152 electroporation experiment.

153 To differentiate the BM cells in vitro, electroporated Lin- cells were switched to indicated  
154 cytokines directly after electroporation; for macrophages, cRPMI with 100 ng/ml of M-CSF  
155 (PeproTech, #315-02) and cultured for 7 days, exchanging half the medium every 2-3 days; for  
156 dendritic cells, cRPMI with 100 ng/ml of Flt3L (Biolegend, #550706) and cultured for 9 days,  
157 with one 1:2 split after 4-5 days.

158 The macrophage phagocytosis assay was performed using a kit (Cayman Chemical,  
159 #600540) as suggested by the manufacturer. Briefly, differentiated macrophages were  
160 incubated with the Latex Beads-Rabbit IgG-PE complex (1:250) in a 6 well plate with 3 ml of  
161 cRPMI for 3 hours at 37 °C. Cells were then washed gently and collected for further analysis.

162

#### 163 2.4 Generating and culturing Hoxb8 BM cells.

164 The Hoxb8 cells were generated by transducing bone marrow cells of C57BL/6 Cas9+ GFP+  
165 mice with an estrogen-inducible retroviral construct expressing HOXB8 (ER-Hoxb8, a kind gift  
166 from Mark P. Kamps, University of California, San Diego) as described [29, 30]. Transduced  
167 BM cells were cultured in 1  $\mu$ M  $\beta$ -estradiol (BE, Sigma-Aldrich, #E2758) and 25 nM mouse  
168 SCF (PeproTech, #250-03) for several weeks with HOXB8 expression turned on to establish a  
169 cell line-like population. To inactivate the HOXB8 activity, BE was withdrawn from the media  
170 for 3 days. The Hoxb8 cells were CRISPR modified in the same way as BM cells (described in  
171 2.2).

172

#### 173 2.5 Culturing and modifying peripheral blood mononuclear cells (PBMC) and Jurkat cells

174 PBMCs were derived from buffy coats from consenting healthy donors (Karolinska Hospital  
175 Blood Bank). PBMCs were isolated using Ficoll-Paque Plus (GE Lifesciences, #17144002)  
176 according to the manufacturer's recommended protocol. PBMCs were cultured in CTS  
177 OpTmizer (Gibco, #A1048501) with 10% heat-inactivated fetal bovine serum, 1% penicillin-  
178 streptomycin-glutamine and 25 units/mL of IL-2 (Peprotech, #200-02), exchanging half the  
179 medium every 2-3 days. To expand the T cell population, PBMCs were stimulated with CD3/28  
180 beads (Milteny Biotech, #130-091-441), re-stimulated every 7-10 days, and analyzed by flow  
181 cytometry to confirm the percentage of T cells in the culture. When used for sgRNA  
182 electroporation, culture was more than 90% T cells (TCR- $\alpha/\beta$  positive cells by flow cytometry).

183 The Jurkat-NFAT-GFP cell line was generated by transducing Jurkat cells (ATCC, TIB-  
184 152) with the pSIRV-NFAT-eGFP plasmid (Addgene, #118031, a gift from Peter Steinberger  
185 [31]) as described in Boddul et al. [32], with the modification that Ecotropic Receptor Booster  
186 (Takara, #631471) was added to the cells as suggested by the manufacturer. The cells were  
187 maintained in cRPMI.

188 For both the Jurkat and PBMCs, the Neon electroporation condition #24 (Pulse voltage:  
189 1600 V, Pulse width: 10 ms, Pulse number: 3) was used. 60 pmol of sgRNA was complexed  
190 with 10 pmol of Cas9 protein (Sigma-Aldrich, #CAS9PROT) and electroporated into  $0.5 \times 10^5$   
191 Jurkat cells per reaction, and 100 pmol of sgRNA was complexed with 16 pmol of Cas9 protein



192 and electroporated into  $2 \times 10^5$  PBMCs per reaction using the Neon Transfection System 10 $\mu$ L  
193 Kit.

194 WT, electroporated (empty) control, and T cell receptor alpha chain constant (TRAC)  
195 sgRNA electroporated PBMCs or Jurkat cells were cultured for at least seven days before the  
196 experiment. The cells were stimulated with 100 nM PMA/Ionomycin (Sigma-Aldrich, #P8139  
197 and #I3909) or CD3/28 beads (Milteny Biotech, #130-091-441) in a 1:1 bead to cell ratio for  
198 18 hours and the beads were removed with the MACSiMAG Separator (Milteny Biotech, 130-  
199 092-168), before analysis by flow cytometry.

200

## 201 2.6 Flow cytometry analysis and sorting

202 Single-cell suspensions were stained for 30 min, washed and sorted using Sony SH800S, or  
203 acquired using BD LSRFortessa, BD FACSVerser, BD Accuri, or Cytex Aurora. Generated FCS  
204 files were analyzed by FlowJo version 10 (FlowJo, LLC).

205 Lin- BM cells were stained with Sca1-PE/Cy7 (Biolegend, #108113), c-Kit-APC (BD  
206 Biosciences, #561074), Lin-biotin (Lineage Cell Detection Cocktail-Biotin, Miltenyi Biotec,  
207 #130-092-613), Streptavidin-PE (BD Biosciences, #554061) and LIVE/DEAD Fixable Aqua  
208 Dead Cell Stain Kit (Invitrogen, #L34957).

209 B cells and T cells were sorted from Zap70 iCR mice spleen stained with CD45.1-FITC  
210 (BD Biosciences, #561871), CD45.2-BV785 (Biolegend, #109839), TCRb-BV711  
211 (Biolegend, #109243), B220-PE (Invitrogen, #12-0452-82) and DAPI (Sigma-Aldrich,  
212 #D9542, 0.1  $\mu$ g/ml).

213 Macrophages were stained with CD11b-PerCP/Cy5.5 (Biolegend, #101228), F4/80-PE  
214 (Biolegend, #123110), and DAPI.

215 Dendritic cells were stained with CD11c-PE-Cy7 (Biolegend, #117318), I-A/I-E-  
216 AlexaFluor 647 (Biolegend, #107617), CD80-APC (Biolegend, #104713), CD86-FITC  
217 (Biolegend, #105005), CD274-PE (Biolegend #124307) and LIVE/DEAD Fixable Near-IR  
218 dead cell stain kit (ThermoFisher Scientific #L10119). After 15 min of staining at room  
219 temperature, cells were washed and analyzed by flow cytometry machine Cytex Arora.

220 Hoxb8 cells were stained with biotin anti-mouse Lineage Panel (BioLegend #133307),  
221 Streptavidin-BV421 (BD Biosciences, #563259), LIVE/DEAD Fixable Aqua Dead Cell Stain  
222 Kit (Invitrogen, #L34957).

223 To confirm TCR $\alpha$  knockout efficiency on Jurkat cells and PBMCs, cells were stained with  
224 TCR  $\alpha/\beta$ -APC antibody (Biolegend, #306717). Stimulated Jurkat cells and PBMCs were

225 stained with TCR  $\alpha/\beta$ -APC antibody (Biolegend, #306717) CD69-PE (Biolegend, #310905),  
226 and LIVE/DEAD Fixable Aqua Dead Cell Stain Kit (Invitrogen, #L34957).

227

228 2.7 Sanger sequencing, Inference of CRISPR Edits (ICE) analysis, and Indel Detection by  
229 Amplicon Analysis (IDAA).

230 At least 10,000 sorted cells or 10  $\mu$ L of whole blood sample were collected for genomic DNA  
231 extraction using the DNeasy Blood & Tissue Kit (Qiagen, #69504). 3  $\mu$ L of genomic DNA was  
232 used as template to amplify the sgRNA target region, using a standard PCR program.  
233 Amplicons were purified directly from PCR reaction mix by using DNA Clean & Concentrator  
234 Kits (Zymo Research, #D4013) or recovered from agarose gel by using Zymoclean Gel DNA  
235 Recovery Kit (Zymo Research, #D4007). The PCR products were quantified by Nanodrop and  
236 sequenced by Eurofins Genomics. The Sanger sequencing data was subsequently analyzed by  
237 ICE (Synthego, <https://ice.synthego.com>). For the IDAA fragment length analysis, genomic  
238 DNA samples were sent to COBO Technologies (<https://cobotechnologies.com/>).

239

240 2.8 Statistics

241 Statistical tests were performed as indicated in the respective figure legend using GraphPad  
242 Prism 8.

243

### 244 **3. Theory/calculation**

245 Sanger sequencing can be used as a simple readout to identify the role of CRISPR-targeted  
246 genes in complex cellular behaviors.

247

### 248 **4. Results**

249 4.1 Lineage negative (Lin-) bone marrow (BM) cells can readily be modified by CRISPR and  
250 evaluated by sequencing.

251 To enable studying the role of different genes in the hematopoietic system, we first set out to  
252 optimize modifying HSCs with CRISPR. To this end, we isolated BM cells from Cas9+ GFP+  
253 mice on the C57BL/6 background [33]. HSCs were enriched by lineage (Lin) depletion (to  
254 eliminate mature Lin+ cells) and electroporated with a GFP targeting sgRNA. The extent of  
255 GFP inactivation (KO) was analyzed by flow cytometry (**Fig. 1A**). Screening different  
256 electroporation programs, we identified a set of parameters that gave a good KO efficiency  
257 without a substantial effect on cell survival (**Fig. 1B-C**). We selected condition #5 (pulse  
258 voltage: 1700 V, pulse width: 20 ms, pulse numbers: 1) and further tested how the concentration



259 of sgRNA affected the KO efficiency, identifying that doses >50 pmol gave a high and uniform  
260 KO efficiency (**Fig. 1D**). Next, we tested additional parameters affecting the KO efficiency,  
261 including different storage conditions of the sgRNA, as well the inclusion of Trp53 siRNAs,  
262 since transient p53 inhibition has been shown to increase the KO efficiency in CRISPR  
263 experiments [34, 35] while protecting the function of HSCs [36]. We found that using freshly  
264 prepared sgRNAs and Trp53 siRNA increased the KO efficiency of the targeted gene (**Fig. 1E**).

265 GFP, as well as surface markers that can be readily stained with antibodies, are easily  
266 followed by flow cytometry. However, the genotype of most genes is not easily evaluated by  
267 flow cytometry. As an alternative readout, we hypothesized that we instead could use standard  
268 Sanger sequencing to quantify the CRISPR-induced genotype. Using the ICE software [13] to  
269 analyze Sanger sequencing data, we identified that the GFP targeting sgRNA used generated a  
270 diverse genotype in the Lin<sup>-</sup> cells, with a dominant +1 insertion next to the expected cut site  
271 (**Fig. 1F**). To compare the two methods assessing CRISPR-efficiency of gene KO, we generated  
272 a dilution curve of cells with different levels of GFP KO by diluting sgRNA electroporated Lin<sup>-</sup>  
273 BM cells with different proportions of non-electroporated Lin<sup>-</sup> BM cells. Sequencing of the  
274 mutation frequency was then compared to the KO phenotype identified by flow cytometry in  
275 the same cells. We found a good correlation between the two readouts ( $R^2 = 0.87$ ,  $p = 0.0007$ ),  
276 although the sensitivity of the sequencing readout was decreased when mutations were found  
277 at a low frequency, something that can be expected by the nature of the sequence deconvolution  
278 (**Fig. 1G**). As an alternative, we used the IDAA fragment length analysis approach and found  
279 a very strong correlation to the flow cytometry readout ( $R^2 = 0.99$ ,  $p < 0.0001$ ) (**Fig. 1H**).  
280 Sequencing and IDAA can thus both be used as readouts to quantify the mutation frequency  
281 when flow cytometry is not a feasible readout.

282 We next hypothesized that the mutation frequency of one targeted gene ( $X$ ), could predict  
283 the mutation frequency of another gene ( $Y$ ) in a cell population simultaneously electroporated  
284 with two sgRNAs (targeting  $X$  and  $Y$ ). Such an approach is based on the idea that if a cell  
285 inactivates one gene, it has a high chance of also successfully inactivate another co-targeted  
286 gene. This type of approach could be used as a strategy to enrich for cells with the intended  
287 mutation, similar to what has been described by co-targeting *DTR* [37], or *HPRT* [38]. To this  
288 end, we electroporated the Lin<sup>-</sup> BM cells with a combination of GFP and Syk sgRNAs, sorted  
289 the GFP positive (+) and GFP negative (-) cells after two days, and sequenced the targeted *GFP*  
290 and *Syk* loci in the sorted cells (**Fig. 1I**). In line with the hypothesis, cells that failed to inactivate  
291 GFP (GFP<sup>+</sup> cells), had no detectable mutations in *GFP*, and only minimal in *Syk* (**Fig. 1J**). By  
292 now, we concluded that: (i) we had established an optimized system for modifying genes in

293 Lin- BM cells by CRISPR, (ii) a simple Sanger sequencing readout could be used to quantify  
294 the mutation frequency in a cell population, albeit not when the mutations are found at a low  
295 frequency, and (iii) co-targeting *GFP* and a second gene of interest followed by sorting cells  
296 with inactivated GFP constitutes a strategy to enrich for mutations in the gene of interest.

297

298 4.2 Generating immuno-CRISPR (iCR) mice and evaluating the CRISPR-mediated  
299 modifications by sequencing.

300 Next, we applied the optimized protocol to generate *in vivo* models with the modified Lin- BM  
301 cells. For this purpose, Lin- BM cells from Cas9<sup>+</sup> mice were cultured and electroporated with  
302 a *Zap70* targeting sgRNA, followed by transplantation to irradiated recipients, generating what  
303 we refer to as immuno-CRISPR (iCR) mice (**Fig. 2A**). *ZAP70* is a component of the T cell  
304 receptor signaling pathway essential for mature T cell development [39, 40], but with a  
305 redundant role for B cell development [41]. In line with the literature related to *Zap70*  
306 deficiency, we saw a diminished T cell population in the spleen of *Zap70* iCR mice (**Fig. 2B-**  
307 **C**). Furthermore, after sequencing *Zap70* in sorted B and T cells from the *Zap70* iCR mice, we  
308 observed that the B cells showed a high mutation frequency, in concordance with that *ZAP70*  
309 is not important for B cell development. In contrast, none of the sorted T cells had any detectable  
310 *Zap70* mutations (**Fig. 2D**).

311 Occasionally, the mutation frequency achieved in CRISPR-targeted Lin- BM cells is low,  
312 and as a consequence iCR mice generated from these cells typically have a low frequency of  
313 mutations and a higher level of variability between recipient mice as exemplified in **Fig. 2E-F**.  
314 We have noted that performing secondary transplantations from a single successful iCR mouse  
315 in such a situation can expand the number of mice with the desired mutation (**Fig. 2G**).  
316 Importantly, this also gives an example of how an iCR mouse population could be expanded by  
317 secondary transplantation, something that is considerably faster than expanding a traditional  
318 colony of mice by breeding. We concluded that sgRNA electroporated Lin- HSCs can be  
319 grafted into irradiated recipient mice, resulting in the formation of mature immune cells  
320 carrying the intended mutation. Furthermore, the role of a targeted gene in the differentiation  
321 of mature immune cells *in vivo* can be evaluated by sequencing, comparing the genotype of  
322 different cell populations.

323

324 4.3 *In vitro* differentiation of CRISPR-modified BM cells into macrophages and dendritic cells.  
325 In immunological research, immature BM cells are commonly differentiated *in vitro* into  
326 different mature myeloid immune cell populations by the addition of specific cytokines to the

327 cell culture medium [42]. This setup allows for controlled experiments testing parameters in  
328 isolated, non-transformed, immune cells. We next investigated whether the CRISPR-modified  
329 Lin- BM cells could be differentiated *in vitro* to defined mature immune cell populations by  
330 culturing the cells in M-CSF (for macrophage differentiation), or Flt3L (for dendritic cell  
331 differentiation) (**Fig. 3A**). In the M-CSF culture, we observed a good differentiation of cells  
332 into the expected F4/80<sup>high</sup> CD11b<sup>high</sup> macrophage phenotype and observed a high degree of  
333 GFP KO efficiency (**Fig. 3B-C**). To assess whether the functionality of the macrophages was  
334 non-specifically affected by the CRISPR modification, we added PE-labeled IgG-coupled  
335 beads to assess phagocytosis by these cells (**Fig. 3D**). Importantly, we found no difference in  
336 the GFP genotype in the sorted PE<sup>high</sup> and PE<sup>low</sup> cells (**Fig. 3E**). A successful KO event in an  
337 irrelevant gene (GFP in this case) did thus not affected the cells in a non-specific way,  
338 something that could be considered related to how DNA damage affects cells.

339 Similarly, in the Flt3L-supplemented culture, we observed that the CRISPR-modified Lin-  
340 BM cells differentiated well into dendritic cells (CD11c<sup>high</sup>, MHC II<sup>high</sup>) and showed a good  
341 level of GFP KO efficiency (**Fig 3F**). In addition, instead of modifying precursor cells, that are  
342 subsequently differentiated to mature immune cell populations, the sgRNA can also be  
343 electroporated directly into mature immune cells, as exemplified with a human T cell line, and  
344 peripheral blood mononuclear cells (PBMC) in **Supplementary Fig. 1**. We concluded that (i)  
345 the CRISPR-modified Lin- BM cells could be successfully differentiated into macrophages and  
346 dendritic cells, and that (ii) competitive functional assays can be performed with the cells to  
347 identify how specific genes are affecting a studied behavior (as exemplified by phagocytosis),  
348 using a sequence-based readout.

349

350 4.4 Using the Rapid CRISPR Competitive Assay (RCC) to study transformation by the HoxB8  
351 proto-oncogene.

352 Lastly, we wanted to assess if our experimental setup could be used to study the role of different  
353 genes in relation to malignancies of the hematopoietic lineage. To this end, we transduced the  
354 Cas9+ GFP+ BM cells with an inducible construct expressing the proto-oncogene *Hoxb8* [43]  
355 and electroporated them with different sgRNAs to identify the role of targeted genes for the  
356 HOXB8 transformed phenotype (**Fig. 4A**). When the activity of HOXB8 is induced, the BM  
357 cells are proliferating at an immature Lin- stage with a granulocyte-macrophage precursor  
358 (GMP) phenotype (**Fig. 4B**) [29]. As such the cells show behavioral (unlimited proliferation,  
359 block in differentiation) and phenotypic (immature, Lin-) features that overlap with acute  
360 leukemia cells as has been proposed [44, 45]. In contrast, when the HOXB8 activity is turned

361 off, the HOXB8-induced proliferation and differentiation block are eliminated, and the cells  
362 differentiate into mature, Lin<sup>+</sup>, cells with a limited lifespan (**Fig. 4C**) [29, 46]. To test the  
363 experimental setup, we electroporated the HOXB8 transformed cells with a HoxB8 sgRNA and  
364 three days later observed that approximately 50% of the cells had acquired the Lin<sup>+</sup> phenotype,  
365 expected when the activity of HOXB8 was turned off (**Fig. 4D**). We subsequently sorted the  
366 cells into Lin<sup>-</sup> and Lin<sup>+</sup> and sequenced the *Hoxb8* locus to quantify the mutation spectrum. As  
367 expected, we found that the Lin<sup>+</sup> population, which behaved as if the HOXB8 activity was  
368 turned off, showed a 100% mutation frequency in *Hoxb8* (**Fig. 4E**). To our surprise, we also  
369 noted that the Lin<sup>-</sup> population had a significant amount of mutations in the *Hoxb8* gene.  
370 Detailed analysis showed that these mutations almost exclusively corresponded to different  
371 insertion or deletion (InDels) with a multiplier of three nucleotides, in contrast to the Lin<sup>+</sup>  
372 population where InDels consisted of a multiplier of one or two nucleotides (**Fig. 4E-F**). This  
373 is in line with the fact that an InDel with a multiplier of one or two nucleotides causes a  
374 frameshift, premature stop codons, and nonsense-mediated decay, essentially causing a KO of  
375 the gene in most cases [47, 48]. On the other end, InDels with a multiplier of three nucleotides  
376 will result in the insertion or deletion of amino acids (AA) in the translated protein, something  
377 that depending on the protein and the specific site where the change occurs, can inactivate the  
378 protein, or, as it appears to be the case here, leave the protein sufficiently functional.

379 Since our data indicated that we could use the experimental setup to study the role of genes  
380 influencing the transformation caused by HOXB8, we set out to test whether we could identify  
381 more genes involved in the transformed phenotype. Using geneMANIA we identified a list of  
382 proteins that physically interact with HOXB8 (**Fig. 4G**). In addition to the already used Hoxb8  
383 sgRNA, we also decided to target the top two identified candidate genes *Pbx1* and *Meis1* in  
384 HOXB8 transduced cells. We found that all three sgRNA induced a good level of mutations,  
385 with a high level of frameshift mutations in the targeted cell population (**Fig. 4H**). Moreover,  
386 we observed that the *Meis1* sgRNA was able to induce the differentiation of HOXB8 transduced  
387 cells to the Lin<sup>+</sup> phenotype, although at a lower extent when comparing to Hoxb8 targeting  
388 (**Fig. 4I**). In contrast, the *Pbx1* sgRNA had no effect on the transformed Lin<sup>-</sup> phenotype despite  
389 the high level of mutations found in the cells (**Fig. 4H-I**). Sorting the Lin<sup>+</sup> cells in the *Meis1*  
390 sgRNA targeted cell population further confirmed that all identified sequences were InDels  
391 with a multiplication of one or two nucleotides, expected to generate a KO phenotype (**Fig. 4J**).  
392 We concluded that the presented experimental setup is suitable to study genes affecting the  
393 transformed state of a leukemia-like cell population and that Sanger sequencing can be used as  
394 a simple readout to evaluate the experiment.

## 395 **5. Discussion**

396 Comparisons of WT and KO cells have been used for many decades to dissect the role of  
397 specific genes in a given biological context. Traditionally, generating KO alleles have involved  
398 time-consuming and expensive homologous recombination techniques [49]. With the  
399 development of flexible, sequence-specific nucleases, including CRISPR, this process has been  
400 dramatically simplified [50]. However, the resulting genotype in a CRISPR-targeted cell  
401 population is not uniform, as exemplified in Fig. 1F. With a binary mindset (e.g. WT or KO),  
402 the analysis of a CRISPR-targeted population could thus be non-productive. Often, researchers  
403 address the genetic heterogeneity by generating clonal lines of the targeted cells or animals.  
404 This is however not always possible, can result in the selection of traits that are not directly  
405 linked to the intended genotype, and is also time consuming. Instead of identifying the CRISPR-  
406 induced genetic heterogeneity as a problem, we here hypothesized that the heterogeneity could  
407 be embraced for discovery, and that regular Sanger sequencing could be used as a simple  
408 readout to quantify the heterogeneity and identify genotype enrichment. For this purpose,  
409 genomic DNA was isolated from the cells, the CRISPR-targeted region amplified by PCR and  
410 sequenced by standard Sanger sequencing approach followed by analyzing the sequencing  
411 result file with the free web-based software ICE [13]. Delivering a GFP targeting sgRNA into  
412 the Lin<sup>-</sup> BM cells, isolated from Cas9<sup>+</sup> GFP<sup>+</sup> mice, we compared a flow cytometry-based assay  
413 for GFP inactivation to the sequencing of the targeted GFP locus. We found that the readouts  
414 showed a good correlation ( $R^2=0.87$ ), although the sequencing readout evidenced a lower  
415 sensitivity when the mutations were found at a low frequency (Fig. 1G). This could be expected  
416 based on the way ICE analyzes the samples, where the mixed peaks of the sequencing readout  
417 are deconvoluted into frequencies, with low-frequency mutations thus being more difficult to  
418 resolve. As an alternative readout, we used the same genomic DNA samples and the same  
419 primers to perform fragment length analysis (FLA) using the IDAA technology [11, 12]. This  
420 approach separates the PCR product by capillary electrophoresis and in a precise way defines  
421 the size of the different products formed in the PCR reaction. This approach is not constrained  
422 by the same type of sensitivity issues as the sequence deconvolution approach and showed a  
423 great correlation ( $R^2=0.99$ ) to the flow cytometry-based readout (Fig. 1H). Based on the  
424 simplicity, speed, and cost-effectiveness of the Sanger sequencing approach, we have continued  
425 to use this readout, keeping in mind the limitation of detection at low mutation frequencies.  
426 Notably, since the same genomic DNA samples and primers can be used for the FLA, important  
427 samples can be analyzed first by the Sanger sequencing approach and subsequently by FLA if



428 necessary. NGS-based readouts can also be considered, and several amplicon-based analysis  
429 pipelines are established for analyzing CRISPR targets [8-10].

430

431 As we had optimized culture conditions and sgRNA delivery to mouse Lin- BM cells, we next  
432 performed a set of experiments to assess the discovery potential using Sanger sequencing as a  
433 readout. Conceptually, the idea was to let cells with different genotypes compete and see if  
434 specific genotypes were enriched when studying different cellular behaviors or phenotypes. We  
435 refer to this setup as the rapid CRISPR competitive (RCC) assay. Notably, in many ways, the  
436 RCC assay exploits the same fundamental mechanisms as a CRISPR screen but focuses on one  
437 gene (that is Sanger sequenced), instead of a set of genes (where sgRNA barcodes are sequenced  
438 by NGS in the screen setting). To this end, we first tested if the approach could be used to  
439 identify genes that affect the development of immune cells *in vivo*. We electroporated the Lin-  
440 BM cells (GFP<sup>+</sup> Cas9<sup>+</sup> CD45.1<sup>+</sup>) with a Zap70 sgRNA and transfer them into irradiated  
441 CD45.2<sup>+</sup> (GFP<sup>+</sup> Cas9<sup>+</sup> CD45.2<sup>+</sup>) recipient mice. In the recipient mice, the transferred,  
442 modified BM cells graft into the BM compartment and start generating new immune cells that  
443 can be tracked by the CD45.1 expression. We refer to these mice as immuno-CRISPR (iCR)  
444 mice. *Zap70* was selected as a proof-of-concept target, as it is known to be essential for T cell  
445 development, while not affecting for example B cell development [39-41]. As anticipated, we  
446 found that sorted CD45.1<sup>+</sup> B cells had a high proportion of mutations in *Zap70*, while we could  
447 not detect any mutations in CD45.1<sup>+</sup> T cells in the *Zap70* iCR mice (Fig. 2D). The RCC assay  
448 thus worked well to evaluate the role of *Zap70 in vivo*. Considering the complexity and cost of  
449 generating gene-modified mice, even with novel CRISPR-based approaches, we see great  
450 potential in using the iCR approach to rapidly study the role of different candidate genes in  
451 mature immune cells and hematopoiesis. This approach shares similarities with mixed bone  
452 marrow chimera experiments, but instead of using flow cytometry to identify the  
453 enrichment/depletion of cells with specific congenic markers (used as a proxy for a specific  
454 genotype), sequencing is directly used to identify the enrichment/depletion of specific  
455 genotypes.

456

457 In line with the *in vivo* differentiation data, we also found that the modified Lin- BM cells could  
458 be readily differentiated *in vitro* into both macrophages and dendritic cells with an expected  
459 phenotype (Fig. 3B, F). Importantly, we found that in a mixed population of GFP WT and GFP  
460 KO macrophages differentiated from BM cells electroporated with a GFP sgRNA, both cells  
461 performed equally well in a functional phagocytosis assay (Fig. 3D-E). As GFP is not involved



462 in the phagocytosis process, this experiment shows that CRISPR-induced DNA damage does  
463 not compromise or generate non-specific effects in the target cells [34-36].

464

465 Lastly, we explored whether our analysis pipeline could also be used to study malignant  
466 transformation induced by the overexpression of a proto-oncogene. We induced the activity of  
467 HOXB8 in BM cells, resulting in a transformed state characterized by the cells proliferating at  
468 an immature (Lin<sup>-</sup>), leukemia-like, differentiation stage [29]. Subsequently, we evaluated cell  
469 differentiation into the mature (Lin<sup>+</sup>) non-transformed state as cells were electroporated with  
470 different sgRNAs, aiming to identify potential drug targets affecting the transformed  
471 phenotype. Initially, we targeted *Hoxb8* itself as a proof-of-concept. We found that half of the  
472 CRISPR-targeted cells lost the leukemia-like phenotype and differentiated to mature (Lin<sup>+</sup>)  
473 cells defined by expected inactivating mutations in the *Hoxb8* region (Fig. 4D-F). Interestingly,  
474 we also found that the Lin<sup>-</sup> population had a fair amount of mutations, despite retaining the  
475 HOXB8-induced transformed phenotype (Fig. 4E-F). By closer examination, we noted that the  
476 mutations found in the Lin<sup>-</sup> population were mainly -3, -6, and -12 nucleotides, corresponding  
477 to the deletion of 1, 2, and 4 AAs, respectively. In the Lin<sup>+</sup> population, we instead found a  
478 dominant +1 mutation, followed by less abundant -2, -1, -7, -2, +2, -4 and -1 mutations, all  
479 being frameshift mutations resulting in premature stop codons, and nonsense-mediated decay  
480 [47, 48]. This observation suggests that the deleted AAs found in the Lin<sup>-</sup> population are not  
481 essential for the HOXB8 activity. Arguably, such a phenomenon can be expected to be very  
482 protein and target specific. For example, we see no evidence for such phenomenon with the  
483 used GFP sgRNA, where sorted GFP<sup>+</sup> cells in a population targeted by the GFP sgRNA, had  
484 no detectable InDels (Fig. 1J). Nevertheless, the *Hoxb8* data (Fig. 4E-F) identified that  
485 comparing the frequency of total InDels to the frequency of InDels expected to result in a KO  
486 phenotype (insertion/deletion with a multiplier of 1-2 nucleotides; frameshift) could be a way  
487 to identify protein domains with structural and functional significance.

488 The lack of effect by knocking out *Pbx1* in HOXB8 overexpressing cells (Fig. 4I) was  
489 surprising as the PBX1 binding site in HOXB8 has been reported to be important for most, but  
490 not all, features of HOXB8 overexpression in experimental systems [46]. However, our data is  
491 in line with CRISPR screen data from HOXB8 overexpressing cells, identifying that *Hoxb8*,  
492 and *Meis1*, but not *Pbx1*, sgRNAs are lost over time [51]. The influence of *Pbx1* deficiency on  
493 the system could also be influenced by the specific differentiation stage of the HOXB8  
494 transformed cells, where the SCF culture condition used here results in a granulocyte-  
495 macrophage progenitor (GMP) phenotype. Notably, Ficara et al. showed that *Pbx1* deficiency

496 gives a relatively mild phenotype in GMP cells compared to for example long-term  
497 hematopoietic stem cells (LT-HSCs) [52].

498

499 The concept of comparing cells or microorganisms with different genotypes in competitive  
500 settings is a proven discovery model. It is, for example, the basis for CRISPR and shRNA  
501 screens, as well as for mixed BM chimera experiments. The same “survival of the fittest”  
502 mechanisms is furthermore the basis for the enrichment of specific mutations in cancer cells  
503 and infectious agents, both spontaneously over time and in response to drugs [53-56]. The  
504 selection of specific genotypes in all these settings infers a central functionality to the specific  
505 genotypes and can thereby guide the development of drug candidates targeting the identified  
506 genes/proteins. Here, we set out to establish a simple experimental setup to identify the role of  
507 different genes in studied cellular behaviors. We use standard Sanger sequencing to quantify  
508 the genetic diversity induced at a CRISPR-targeted site and use enrichment of specific  
509 genotypes to identify the role for the studied gene.

510

## 511 **6. Conclusions**

512 Sanger sequencing and sequence deconvolution can be used as a rapid discovery readout to  
513 identify the role of CRISPR-targeted genes.

514

## 515 **7. Acknowledgements**

516 We are grateful to Drs. Petter Woll, Helena Malmgren, Lisa Westerberg, Taras Kreslavskiy,  
517 and Sudeepta Panda for valuable discussions. The ER-Hoxb8 construct was a gift from Mark  
518 P. Kamps, University of California, San Diego. The pSIRV-NFAT-eGFP construct was a gift  
519 from Peter Steinberger, Medical University of Vienna. This research was partly funded by  
520 grants from the Swedish Research Council, the Swedish Cancer Society, Karolinska Institutet,  
521 Åke Olssons stiftelse, Magnus Bergvalls stiftelse, Stiftelsen Professor Nanna Svartz fond, Felix  
522 Mindus contribution to Leukemia Research (to FW), the China Scholarship Council (to LJ and  
523 YS), and the Nanyang Technological University–Karolinska Institutet Joint PhD Programme  
524 (to VSI).

525

## 526 **8. References**

527 - [1] L. Cong, F. A. Ran, D. Cox, S. Lin, R. Barretto, N. Habib *et al.* Multiplex genome  
528 engineering using CRISPR/Cas systems. *Science*, 2013;339:819-23.

- 529 - [2] M. Jinek, K. Chylinski, I. Fonfara, M. Hauer, J. A. Doudna, E. Charpentier. A  
530 programmable dual-RNA-guided DNA endonuclease in adaptive bacterial immunity. *Science*,  
531 2012;337:816-21.
- 532 - [3] P. Mali, L. Yang, K. M. Esvelt, J. Aach, M. Guell, J. E. DiCarlo *et al.* RNA-guided human  
533 genome engineering via Cas9. *Science*, 2013;339:823-6.
- 534 - [4] K. S. Makarova, Y. I. Wolf, J. Iranzo, S. A. Shmakov, O. S. Alkhnbashi, S. J. J. Brouns *et al.*  
535 Evolutionary classification of CRISPR-Cas systems: a burst of class 2 and derived variants. *Nat*  
536 *Rev Microbiol*, 2020;18:67-83.
- 537 - [5] A. Hendel, R. O. Bak, J. T. Clark, A. B. Kennedy, D. E. Ryan, S. Roy *et al.* Chemically  
538 modified guide RNAs enhance CRISPR-Cas genome editing in human primary cells. *Nat*  
539 *Biotechnol*, 2015;33:985-9.
- 540 - [6] V. T. Chu, T. Weber, B. Wefers, W. Wurst, S. Sander, K. Rajewsky *et al.* Increasing the  
541 efficiency of homology-directed repair for CRISPR-Cas9-induced precise gene editing in  
542 mammalian cells. *Nat Biotechnol*, 2015;33:543-8.
- 543 - [7] L. S. Symington, J. Gautier. Double-strand break end resection and repair pathway  
544 choice. *Annu Rev Genet*, 2011;45:247-71.
- 545 - [8] L. Pinello, M. C. Canver, M. D. Hoban, S. H. Orkin, D. B. Kohn, D. E. Bauer *et al.*  
546 Analyzing CRISPR genome-editing experiments with CRISPResso. *Nat Biotechnol*,  
547 2016;34:695-7.
- 548 - [9] H. Lindsay, A. Burger, B. Biyong, A. Felker, C. Hess, J. Zaugg *et al.* CrispRVariants charts  
549 the mutation spectrum of genome engineering experiments. *Nat Biotechnol*, 2016;34:701-2.
- 550 - [10] K. Labun, X. Guo, A. Chavez, G. Church, J. A. Gagnon, E. Valen. Accurate analysis of  
551 genuine CRISPR editing events with ampliCan. *Genome Res*, 2019;29:843-7.
- 552 - [11] L. A. Lonowski, Y. Narimatsu, A. Riaz, C. E. Delay, Z. Yang, F. Niola *et al.* Genome editing  
553 using FACS enrichment of nuclease-expressing cells and indel detection by amplicon analysis.  
554 *Nat Protoc*, 2017;12:581-603.
- 555 - [12] E. P. Bennett, B. L. Petersen, I. E. Johansen, Y. Niu, Z. Yang, C. A. Chamberlain *et al.*  
556 INDEL detection, the 'Achilles heel' of precise genome editing: a survey of methods for  
557 accurate profiling of gene editing induced indels. *Nucleic Acids Res*, 2020;48:11958-81.
- 558 - [13] T. Hsiao, T. Maures, K. Waite, J. Yang, R. Kelso, K. Holden *et al.* Inference of CRISPR  
559 Edits from Sanger Trace Data. *bioRxiv*, 2018:251082.
- 560 - [14] E. K. Brinkman, B. van Steensel. Rapid Quantitative Evaluation of CRISPR Genome  
561 Editing by TIDE and TIDER. *Methods Mol Biol*, 2019;1961:29-44.
- 562 - [15] G. J. Spangrude, S. Heimfeld, I. L. Weissman. Purification and characterization of  
563 mouse hematopoietic stem cells. *Science*, 1988;241:58-62.
- 564 - [16] A. Giladi, F. Paul, Y. Herzog, Y. Lubling, A. Weiner, I. Yofe *et al.* Single-cell  
565 characterization of haematopoietic progenitors and their trajectories in homeostasis and  
566 perturbed haematopoiesis. *Nat Cell Biol*, 2018;20:836-46.
- 567 - [17] S. E. W. Jacobsen, C. Nerlov. Haematopoiesis in the era of advanced single-cell  
568 technologies. *Nat Cell Biol*, 2019;21:2-8.
- 569 - [18] S. H. Orkin, L. I. Zon. Hematopoiesis: an evolving paradigm for stem cell biology. *Cell*,  
570 2008;132:631-44.
- 571 - [19] P. Urso, C. C. Congdon. The effect of the amount of isologous bone marrow injected on  
572 the recovery of hematopoietic organs, survival and body weight after lethal irradiation injury  
573 in mice. *Blood*, 1957;12:251-60.
- 574 - [20] E. D. Thomas, H. L. Lochte, Jr., W. C. Lu, J. W. Ferrebee. Intravenous infusion of bone  
575 marrow in patients receiving radiation and chemotherapy. *N Engl J Med*, 1957;257:491-6.
- 576 - [21] F. E. Mercier, D. B. Sykes, D. T. Scadden. Single Targeted Exon Mutation Creates a True  
577 Congenic Mouse for Competitive Hematopoietic Stem Cell Transplantation: The C57BL/6-  
578 CD45.1(STEM) Mouse. *Stem Cell Reports*, 2016;6:985-92.
- 579 - [22] S. L. Zebedee, D. S. Barritt, W. C. Raschke. Comparison of mouse Ly5a and Ly5b  
580 leucocyte common antigen alleles. *Dev Immunol*, 1991;1:243-54.

- 581 - [23] E. Ward, C. DeSantis, A. Robbins, B. Kohler, A. Jemal. Childhood and adolescent cancer  
582 statistics, 2014. *CA Cancer J Clin*, 2014;64:83-103.
- 583 - [24] C. Global Burden of Disease Cancer, C. Fitzmaurice, D. Dicker, A. Pain, H. Hamavid, M.  
584 Moradi-Lakeh *et al.* The Global Burden of Cancer 2013. *JAMA Oncol*, 2015;1:505-27.
- 585 - [25] S. K. Panda, S. V. Boddul, G. Y. Jimenez-Andrade, L. Jiang, Z. Kasza, L. Fernandez-Ricaud  
586 *et al.* Green listed-a CRISPR screen tool. *Bioinformatics*, 2017;33:1099-100.
- 587 - [26] V. S. Iyer, L. Jiang, Y. Shen, S. V. Boddul, S. K. Panda, Z. Kasza *et al.* Designing custom  
588 CRISPR libraries for hypothesis-driven drug target discovery. *Comput Struct Biotechnol J*,  
589 2020;18:2237-46.
- 590 - [27] J. G. Doench, N. Fusi, M. Sullender, M. Hegde, E. W. Vaimberg, K. F. Donovan *et al.*  
591 Optimized sgRNA design to maximize activity and minimize off-target effects of CRISPR-Cas9.  
592 *Nat Biotechnol*, 2016;34:184-91.
- 593 - [28] J. Montojo, K. Zuberi, H. Rodriguez, F. Kazi, G. Wright, S. L. Donaldson *et al.*  
594 GeneMANIA Cytoscape plugin: fast gene function predictions on the desktop. *Bioinformatics*,  
595 2010;26:2927-8.
- 596 - [29] G. G. Wang, K. R. Calvo, M. P. Pasillas, D. B. Sykes, H. Hacker, M. P. Kamps.  
597 Quantitative production of macrophages or neutrophils ex vivo using conditional Hoxb8. *Nat*  
598 *Methods*, 2006;3:287-93.
- 599 - [30] S. K. Panda, G. Wigerblad, L. Jiang, Y. Jimenez-Andrade, V. S. Iyer, Y. Shen *et al.* IL-4  
600 controls activated neutrophil FcγR2b expression and migration into inflamed joints.  
601 *Proc Natl Acad Sci U S A*, 2020;117:3103-13.
- 602 - [31] S. Jutz, J. Leitner, K. Schmetterer, I. Doel-Perez, O. Majdic, K. Grabmeier-  
603 Pfistershammer *et al.* Assessment of costimulation and coinhibition in a triple parameter T  
604 cell reporter line: Simultaneous measurement of NF-κB, NFAT and AP-1. *J Immunol*  
605 *Methods*, 2016;430:10-20.
- 606 - [32] S. R. Boddul SV, Dubnovitsky A, Raposo B, Gerstner C, Shen Y, Iyer VS, Kasza Z, Kwok  
607 WW, Winkler AR, Klareskog L, Malmström V, Bettini M, and Wermeling F. In vitro and ex vitro  
608 functional characterization of human HLA-DRB1\*04 restricted T cell receptors. *Journal of*  
609 *Translational Autoimmunity*, 2021 (accepted).
- 610 - [33] R. J. Platt, S. Chen, Y. Zhou, M. J. Yim, L. Swiech, H. R. Kempton *et al.* CRISPR-Cas9  
611 knockin mice for genome editing and cancer modeling. *Cell*, 2014;159:440-55.
- 612 - [34] E. Haapaniemi, S. Botla, J. Persson, B. Schmierer, J. Taipale. CRISPR-Cas9 genome  
613 editing induces a p53-mediated DNA damage response. *Nat Med*, 2018;24:927-30.
- 614 - [35] R. J. Ihry, K. A. Worringer, M. R. Salick, E. Frias, D. Ho, K. Theriault *et al.* p53 inhibits  
615 CRISPR-Cas9 engineering in human pluripotent stem cells. *Nat Med*, 2018;24:939-46.
- 616 - [36] G. Schirotti, A. Conti, S. Ferrari, L. Della Volpe, A. Jacob, L. Albano *et al.* Precise Gene  
617 Editing Preserves Hematopoietic Stem Cell Function following Transient p53-Mediated DNA  
618 Damage Response. *Cell Stem Cell*, 2019;24:551-65 e8.
- 619 - [37] S. Li, N. Akrap, S. Cerboni, M. J. Porritt, S. Wimberger, A. Lundin *et al.* Universal toxin-  
620 based selection for precise genome engineering in human cells. *Nat Commun*, 2021;12:497.
- 621 - [38] S. Liao, M. Tamaro, H. Yan. Enriching CRISPR-Cas9 targeted cells by co-targeting the  
622 HPRT gene. *Nucleic Acids Res*, 2015;43:e134.
- 623 - [39] A. C. Chan, B. A. Irving, J. D. Fraser, A. Weiss. The zeta chain is associated with a  
624 tyrosine kinase and upon T-cell antigen receptor stimulation associates with ZAP-70, a 70-  
625 kDa tyrosine phosphoprotein. *Proc Natl Acad Sci U S A*, 1991;88:9166-70.
- 626 - [40] I. Negishi, N. Motoyama, K. Nakayama, K. Nakayama, S. Senju, S. Hatakeyama *et al.*  
627 Essential role for ZAP-70 in both positive and negative selection of thymocytes. *Nature*,  
628 1995;376:435-8.
- 629 - [41] F. Fallah-Arani, E. Schweighoffer, L. Vanes, V. L. Tybulewicz. Redundant role for Zap70  
630 in B cell development and activation. *Eur J Immunol*, 2008;38:1721-33.
- 631 - [42] J. E. Gropman, J. M. Molina, D. T. Scadden. Hematopoietic growth factors. *Biology*  
632 and clinical applications. *N Engl J Med*, 1989;321:1449-59.

- 633 - [43] Y. Ying, Y. Wang, X. Huang, Y. Sun, J. Zhang, M. Li *et al.* Oncogenic HOXB8 is driven by  
634 MYC-regulated super-enhancer and potentiates colorectal cancer invasiveness via BACH1.  
635 *Oncogene*, 2020;39:1004-17.
- 636 - [44] N. Goardon, E. Marchi, A. Atzberger, L. Quek, A. Schuh, S. Soneji *et al.* Coexistence of  
637 LMPP-like and GMP-like leukemia stem cells in acute myeloid leukemia. *Cancer Cell*,  
638 2011;19:138-52.
- 639 - [45] M. Salmanidis, G. Brumatti, N. Narayan, B. D. Green, J. A. van den Bergen, J. J. Sandow  
640 *et al.* Hoxb8 regulates expression of microRNAs to control cell death and differentiation. *Cell*  
641 *Death Differ*, 2013;20:1370-80.
- 642 - [46] P. S. Knoepfler, D. B. Sykes, M. Pasillas, M. P. Kamps. HoxB8 requires its Pbx-  
643 interaction motif to block differentiation of primary myeloid progenitors and of most cell line  
644 models of myeloid differentiation. *Oncogene*, 2001;20:5440-8.
- 645 - [47] P. D. Hsu, E. S. Lander, F. Zhang. Development and applications of CRISPR-Cas9 for  
646 genome engineering. *Cell*, 2014;157:1262-78.
- 647 - [48] S. Lykke-Andersen, T. H. Jensen. Nonsense-mediated mRNA decay: an intricate  
648 machinery that shapes transcriptomes. *Nat Rev Mol Cell Biol*, 2015;16:665-77.
- 649 - [49] R. Mortensen. Overview of Gene Targeting by Homologous Recombination. *Current*  
650 *Protocols in Molecular Biology*, 2006;76:23.1.1-.2.12.
- 651 - [50] T. Gaj, C. A. Gersbach, C. F. Barbas, 3rd. ZFN, TALEN, and CRISPR/Cas-based methods  
652 for genome engineering. *Trends Biotechnol*, 2013;31:397-405.
- 653 - [51] S. Basilico, X. Wang, A. Kennedy, K. Tzelepis, G. Giotopoulos, S. J. Kinston *et al.*  
654 Dissecting the early steps of MLL induced leukaemogenic transformation using a mouse  
655 model of AML. *Nat Commun*, 2020;11:1407.
- 656 - [52] F. Ficara, M. J. Murphy, M. Lin, M. L. Cleary. Pbx1 regulates self-renewal of long-term  
657 hematopoietic stem cells by maintaining their quiescence. *Cell Stem Cell*, 2008;2:484-96.
- 658 - [53] M. Xie, C. Lu, J. Wang, M. D. McLellan, K. J. Johnson, M. C. Wendl *et al.* Age-related  
659 mutations associated with clonal hematopoietic expansion and malignancies. *Nat Med*,  
660 2014;20:1472-8.
- 661 - [54] P. C. Nowell. The clonal evolution of tumor cell populations. *Science*, 1976;194:23-8.
- 662 - [55] Y. Weisblum, F. Schmidt, F. Zhang, J. DaSilva, D. Poston, J. C. Lorenzi *et al.* Escape from  
663 neutralizing antibodies by SARS-CoV-2 spike protein variants. *Elife*, 2020;9.
- 664 - [56] F. Klein, A. Halper-Stromberg, J. A. Horwitz, H. Gruell, J. F. Scheid, S. Bournazos *et al.*  
665 HIV therapy by a combination of broadly neutralizing antibodies in humanized mice. *Nature*,  
666 2012;492:118-22.

667

Graphical representation:

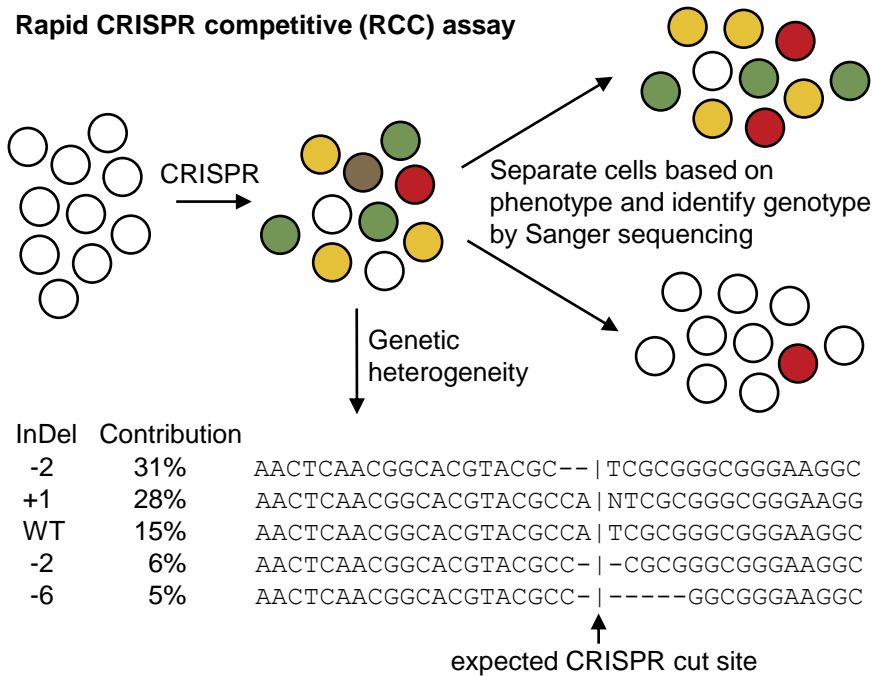

Highlights:

- CRISPR generates genetic heterogeneity at the targeted site.
- Genetic heterogeneity complicates identifying the role of a targeted gene.
- Heterogeneity can be quantified by Sanger sequencing with sufficient sensitivity.
- Enrichment of specific genotypes can be used to identify roles for targeted genes.
- Competitive experiments show the potential of genotype enrichment as a discovery tool.



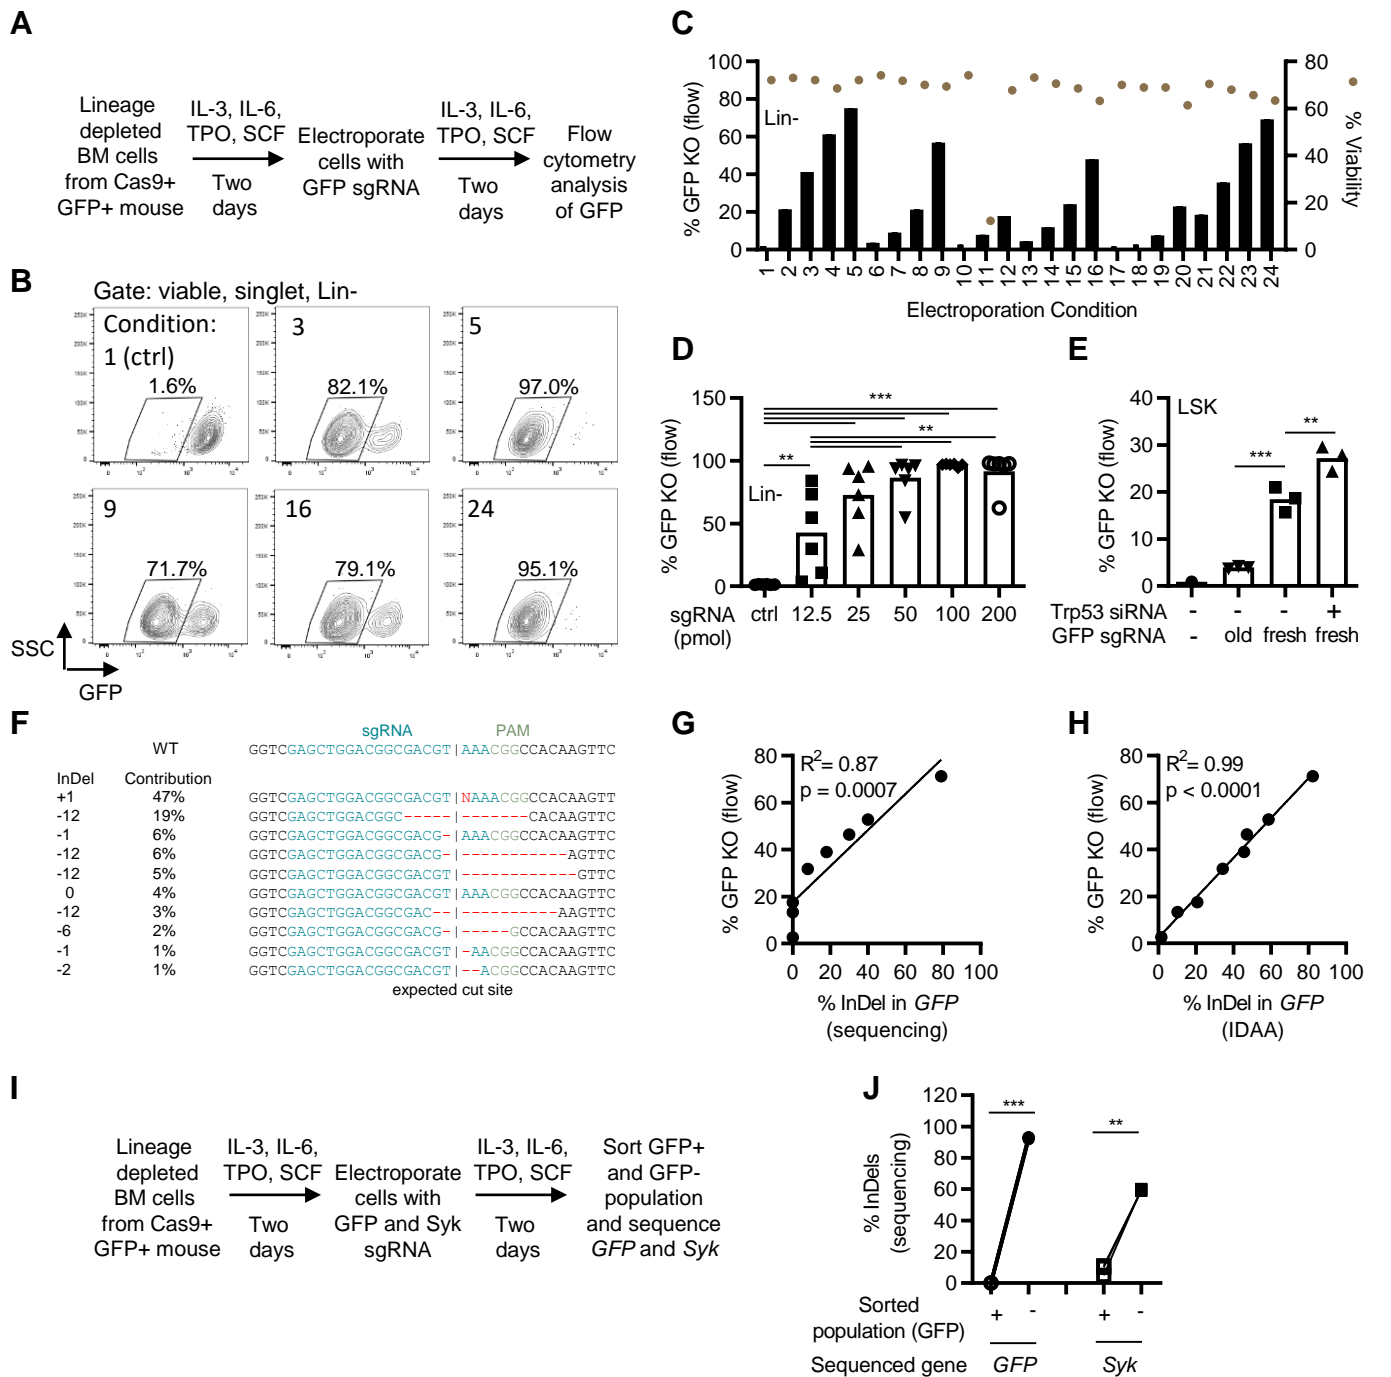

**Figure 1. Lineage negative (Lin<sup>-</sup>) bone marrow (BM) cells can readily be modified by CRISPR and evaluated by sequencing.** (A) Model describing the experimental setup where Lin<sup>-</sup> BM cells were cultured in a cytokine cocktail, electroporated with a GFP targeting sgRNA, and analyzed by flow cytometry. (B-C) flow cytometry analysis of GFP expression in Lin<sup>-</sup> BM cells two days after electroporation with a GFP sgRNA comparing different electroporation programs. Condition 5 (pulse voltage: 1700 V, pulse width: 20 ms, pulse numbers: 1) was selected for further experiments. B and C represent two different experiments with slightly different efficiency. (D) Flow cytometry analysis of GFP KO cell % two days after electroporation with different amounts of the GFP sgRNA. Gate: viable, single, Lin<sup>-</sup> cells. (E) Flow cytometry analysis of GFP KO cell % two days after electroporation with a sgRNA solution that had been stored in -20°C for several weeks (old), or a freshly dissolved sgRNA (fresh) in the presence of a Trp53 siRNA. Gate: viable, single, Lin<sup>-</sup>, Sca-1<sup>+</sup>, c-Kit<sup>+</sup> (LSK) cells. (F) Analysis of the sgRNA targeted GFP region showing the generated mutation spectrum. Data generated by the ICE software based on Sanger sequencing of PCR product. (G) Comparison of the identified % insertion and deletions (InDels) in GFP using sequencing and the % GFP KO cells by flow cytometry. (H) Comparison of the identified % insertion and deletions (indels) in GFP using the InDel Detection by Amplicon Analysis (IDAA) assay and the % GFP KO cells by flow cytometry. (I) Model describing simultaneously targeting *GFP* and *Syk*. (J) Quantification of % InDels in *GFP* and *Syk* in cells sorted based on GFP expression. Data shown as individual data points (B-C, G-H, J, n=3), mean and individual data points (D, n=6; E, n=3). \*\* = p < 0.01, \*\*\* = p < 0.001 by one-way ANOVA and Turkey's post-test (D-E), simple linear regression (G-H), or paired T-test (J).

**A**

Making Zap70 immuno-CRISPR (iCR) mice:

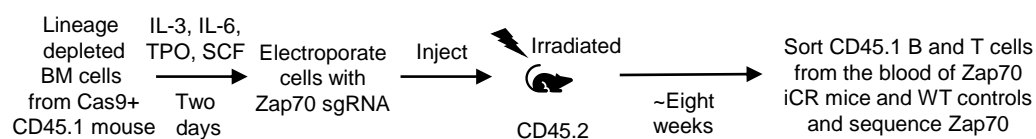**B**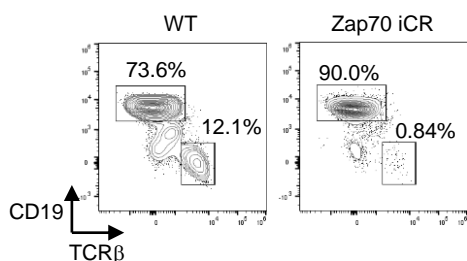**C**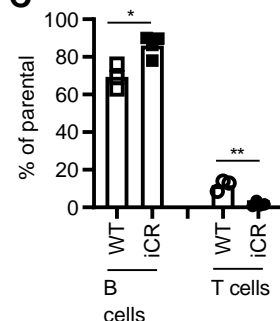**D**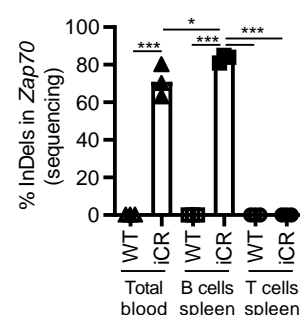**E**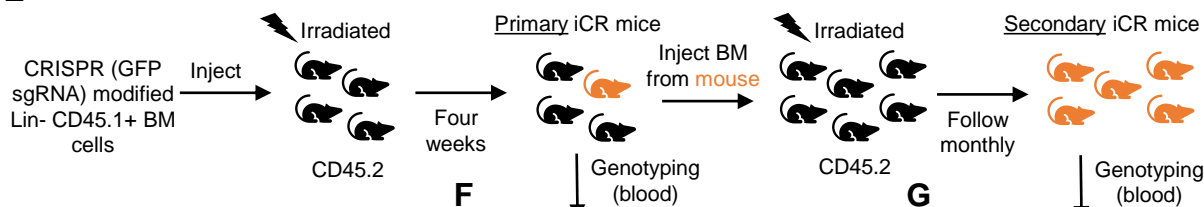**F**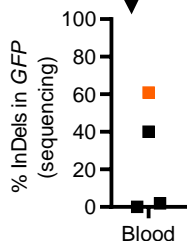**G**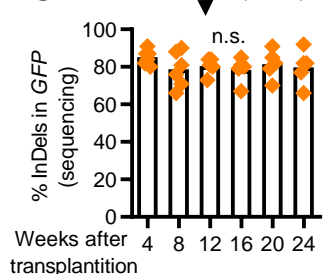

**Figure 2. Generating immuno-CRISPR (iCR) mice and evaluating the CRISPR-mediated modifications by sequencing.** (A) Model describing the experimental setup where CD45.1+ Lin- BM cells were modified by CRISPR targeting *Zap70* and grafted into irradiated CD45.2+ recipients. (B) Flow cytometry analysis of cells in the blood of *Zap70* iCR mice and WT control mice eight weeks post transplantation. Cells gated on viable, CD45.1+, single lymphocytes. (C) Quantification of B and T cells in the blood of WT and *Zap70* iCR mice in (B). (D) Analysis of the level of mutations in the sgRNA targeted *Zap70* region in total cells from the blood, as well as in B and T cells sorted from the spleen of *Zap70* iCR mice and WT control mice. (E) Model describing the experimental setup where a secondary transplantation was used to amplify the population of successfully modified mice. (F) Analysis of the level of mutations in the sgRNA targeted *GFP* region in blood cells of the *GFP* iCR mice four weeks after transplantation, in an experiment with low efficiency. One mouse showed good knockout efficiency (labeled in orange) and was used as BM donor for secondary transplantation. (G) Kinetics of the level of mutations of *GFP* in the secondary iCR mice. Data shown as mean and individual data points (C-D, n=3; F, n=4; G, n=5-6). n.s. = non-significant, \* = p < 0.05, \*\* = p < 0.01, \*\*\* = p < 0.001 by unpaired T-test (C), and one-way ANOVA and Turkey's post-test (D, H).

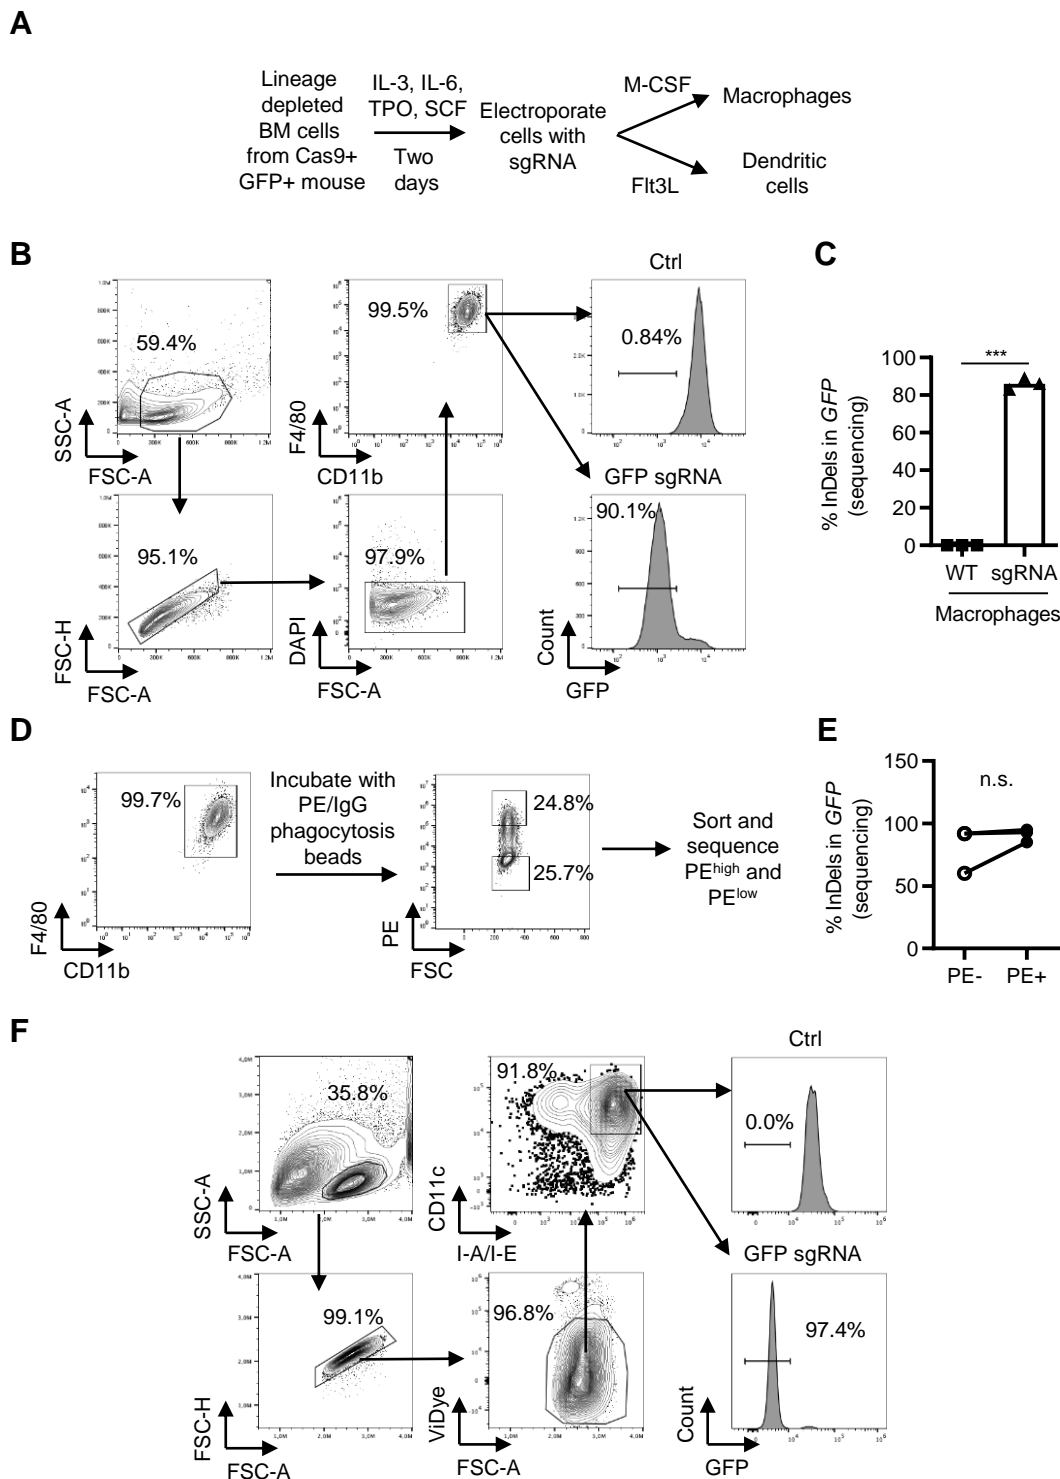

**Figure 3. *In vitro* differentiation of CRISPR-modified BM cells into macrophages and dendritic cells.** (A) Model describing the experimental setup. (B) Flow cytometry plots showing the gating strategy for cells differentiated for seven days in M-CSF. (C) *GFP* InDel frequency in sorted viable macrophages from M-CSF cultures. (D) Macrophages were incubated with PE/IgG phagocytosis beads and three hours later sorted for the level of binding to the beads into PE<sup>high</sup> and PE<sup>low</sup> populations. (E) The sorted populations were sequenced and the % of *GFP* InDels in the two populations was quantified. (F) Flow cytometry plots showing the gating strategy for cells differentiated for nine days in Flt3L. Data shown as representative flow cytometry plots (B, D, F), mean and individual data (C, n=3), and individual data (E, n=3). n.s. = non-significant, \*\*\* =  $p < 0.001$  by unpaired T-test (C), and paired T-test (E).

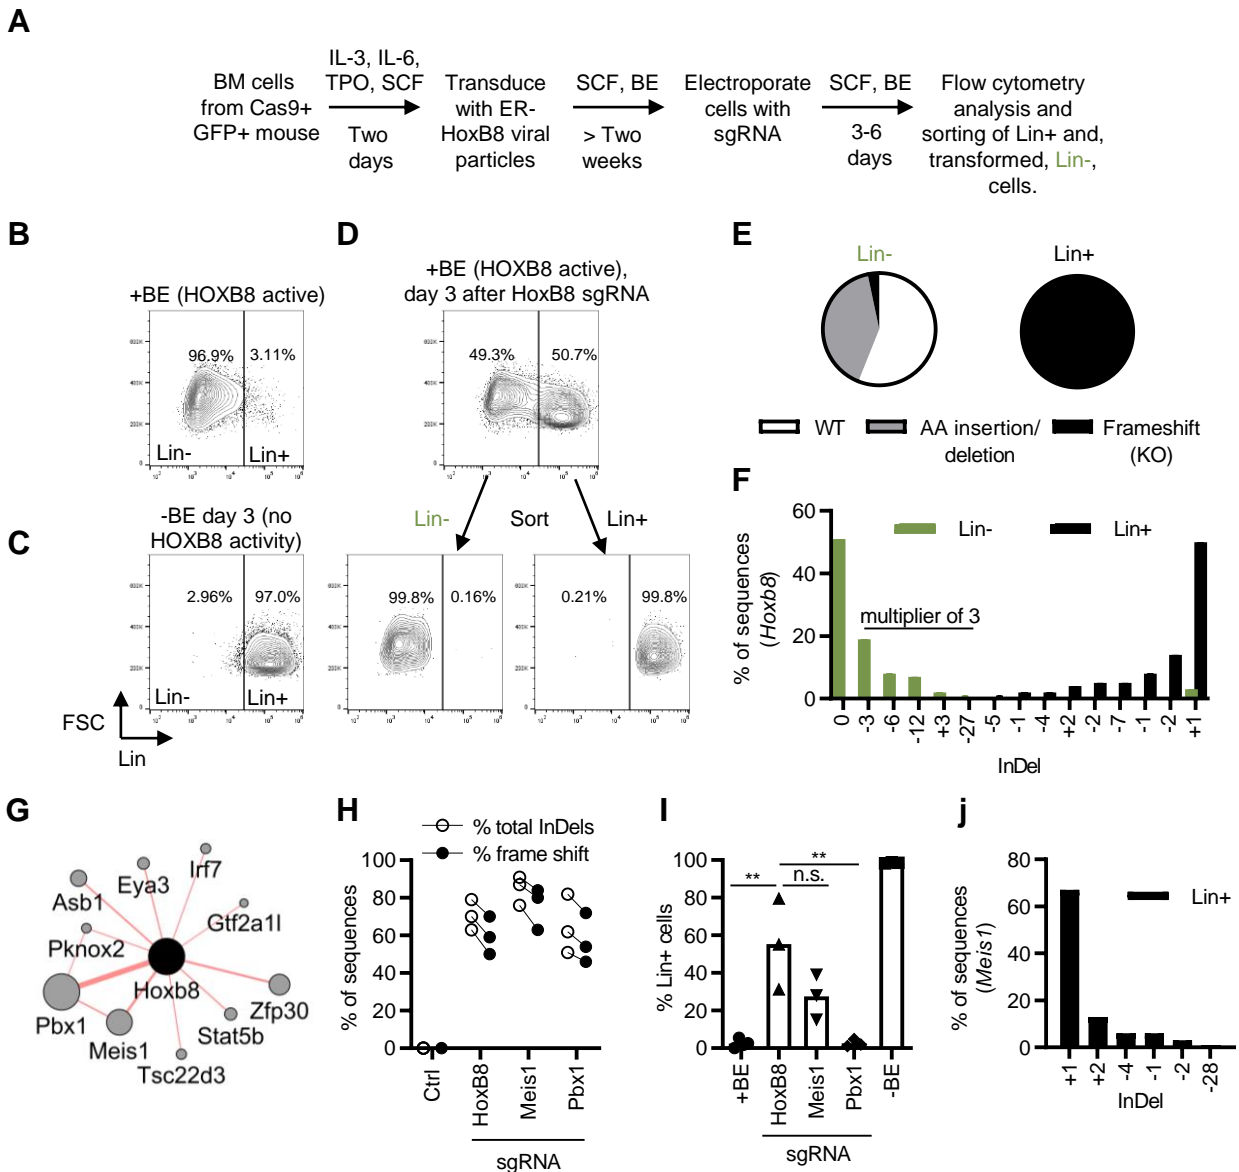

**Figure 4. Using the Rapid CRISPR Competitive Assay (RCC) to study transformation by the HoxB8 proto-oncogene.** (A) Model describing the experimental setup where Cas9+ BM cells were transduced with Estrogen Receptor (ER)-HoxB8 retroviral particles. HoxB8 in the transduced cells is activated by the addition of  $\beta$ -estradiol (BE), resulting in proliferation and block of differentiation at an immature Lin<sup>-</sup> stage. The cells were subsequently electroporated with different sgRNAs to identify genes affecting the transformed, Lin<sup>-</sup>, phenotype. (B-C) Flow cytometry analysis of ER-HoxB8 BM cells in the presence (B), or absence of BE (C). (D) Sorting of Lin<sup>-</sup> and Lin<sup>+</sup> ER-HoxB8 BM cells three days after electroporation with a HoxB8 sgRNA. (E) Sequencing of the sgRNA targeted *HoxB8* locus, and deconvolution of mutation spectrum using ICE. Data shows the % of different InDels identified in the Lin<sup>-</sup> (green) and Lin<sup>+</sup> (black) sorted cells. (F) representation of the type of mutations found in the sorted Lin<sup>-</sup> and Lin<sup>+</sup> population; WT (no InDels), Amino acid (AA) insertion/deletion (InDels with a multiplier of 3 nucleotides, resulting in the addition or removal of amino acids), Frameshift (InDels with a multiplier of 1 or 2 nucleotides, resulting in a frameshift, and introduction of premature stop codon). (G) Top physical interaction partners of HOXB8 identified by geneMANIA. The size of the circle indicates the level of identified interactions, where the larger circles represent more prominent interaction partners. (H-I) The ER-HoxB8 BM cells were cultured in BE, to keep HOXB8 active, electroporated with indicated sgRNAs, and sequenced to quantify the level of induced mutations (H), as well as analyzed by flow cytometry for Lin expression (% Lin<sup>+</sup> cells) after 3 or 6 days (three independent experiments represented in the graphs) (I). (J) Genotype of the CRISPR-targeted *Meis1* region in sorted Lin<sup>+</sup> cells from *Meis1* sgRNA electroporated cells. Data shown as individual data points (H, n=3), or mean and individual data points (I, n=3). n.s. = non-significant, \*\* = p < 0.01 by one-way ANOVA and Turkey's post-test (I).

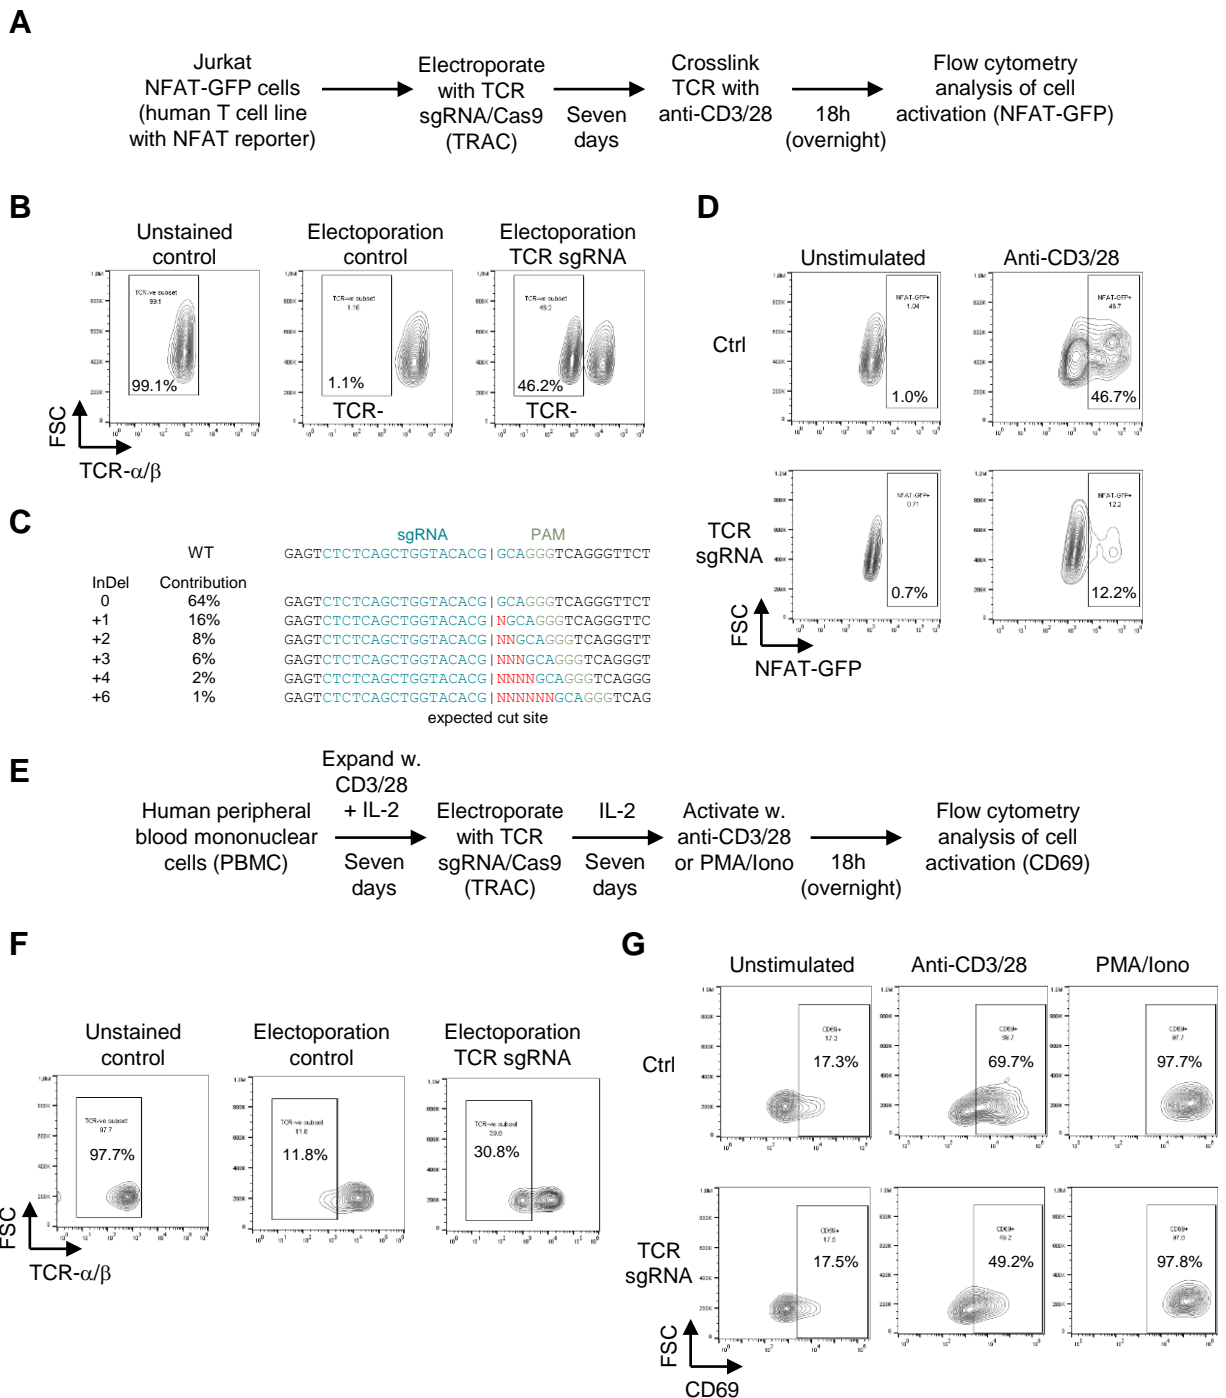

**Supplementary Figure 1. CRISPR KO in T cells.** (A). Model describing the experimental setup where Jurkat NFAT-GFP reporter cells were electroporated with a sgRNA/Cas9 complex targeting the constant domain of the TCR alpha chain (TRAC). (B-C) Confirmation of TCR KO efficiency in the Jurkat NFAT-GFP cells by flow cytometry (anti-TCR- $\alpha/\beta$ -APC) (B), and by sequencing (C) two days after electroporation. Unstained control was not electroporated. Electroporated control was electroporated without a sgRNA. (D) TCR sgRNA treated cells show a dampened response to TCR stimulation through lesser GFP upregulation following activation. CD3/28 stimulation was done with CD3/28 coated magnetic beads for 24 hours in a 1:1 ratio to the total number of cells. (E) Model describing the experimental setup where human peripheral blood mononuclear cells (PBMC) were electroporated with the TRAC sgRNA/Cas9 complex. (F) Confirmation of the level of TCR KO in PBMCs by flow cytometry (anti-TCR- $\alpha/\beta$ -APC). Unstained control was not electroporated. Electroporated control was electroporated without a sgRNA. (G) TCR sgRNA treated PBMC shows a dampened response to TCR stimulation through lower CD69 upregulation. As expected, the TCR sgRNA does not affect alternative activation pathways as in the case of PMA/Ionomycin stimulation. CD3/28 stimulation was done with CD3/28 coated magnetic beads for 18 hours in a 1:1 ratio to the total number of cells. PMA/Ionomycin stimulation was done with 100nM/mL each of PMA and Ionomycin for 18 hours.

Sup. Table 1

| Gene                                           | gRNA sequence        |
|------------------------------------------------|----------------------|
| <i>GFP</i>                                     | GAGCUGGACGGCGACGUAAA |
| <i>Zap70</i>                                   | CAACGGCACGUACGCCAUCG |
| <i>Syk</i>                                     | GTCTTGGGCTGTACTCCCGG |
| <i>Hoxb8</i>                                   | CCAGCAGAACCCGUGCGCCG |
| <i>Meis1</i>                                   | AUGCGGGUCCCCAUACAUCG |
| <i>Pbx1</i>                                    | UGCAGGUUCAGACAACUCAG |
| <i>hTCR<math>\alpha</math></i> ( <i>TRAC</i> ) | CUCUCAGCUGGUACACGGCA |

Sup. Table 2

| Gene                                              | Forward (5' – 3')     | Reverse (5' – 3')        | Tm/length   |
|---------------------------------------------------|-----------------------|--------------------------|-------------|
| <i>GFP</i>                                        | CCTACAACAAGCACCGGGAT  | TCTTGTAGTTGCCGTCGTCC     | 60°C/663 bp |
| <i>Zap70</i>                                      | ACCATGATGGCCCTGAAACG  | ATGAAGACACAGCATCAGCCT    | 60°C/505 bp |
| <i>Syk</i>                                        | ATGTGAGGACTCCGCTTTGG  | CATGACCGATGGGCTCTACC     | 60°C/480 bp |
| <i>Hoxb8</i> *                                    | AACGTGGTGCCCTCTATGA   | GATCCTCCGCTTGCATTCA      | 59°C/725 bp |
| <i>Meis1</i>                                      | TCCCCGCTATACCCAAA     | AACTTTAGAGATGTAAGGCCAGGG | 58°C/500 bp |
| <i>Pbx1</i>                                       | TGGCTTGATTGAGAGACGCAG | TTCAATAGTTGAGGCCAGGGTC   | 58°C/520 bp |
| <i>hTCR<math>\alpha</math></i><br>( <i>TRAC</i> ) | CCTGAAGCAAGGAAACAGCC  | CTTGTGCCTGTCCCTGAGTC     | 59°C/518 bp |

\*amplifies the ER-*Hoxb8* sequence and not the endogenous *Hoxb8*
